# Supplementary material for: Cationic iridium(iii) complexes bearing ancillary 2,5-dipyridyl(pyrazine) (2,5-dpp) and 2,2′:5′,2′′-terpyridine (2,5-tpy) ligands: synthesis, optoelectronic characterization and light-emitting electrochemical cells
Source: Royal Society of Chemistry journal article supplement (doi:10.1039/c4dt02100b), 2014-01-01
Supplement: c4dt02100b1.pdf [file c4dt02100b1.pdf]

# Cationic Iridium (III) Complexes Bearing Ancillary 2,5-dipyridyl(pyrazine) (2,5-dpp) and 2,2':5',2''- terpyridine (2,5-tpy) ligands: Synthesis, Optoelectronic Characterization and Light-Emitting Electrochemical Cells.

*Kamrul Hasan,<sup>a</sup> Loïc Donato,<sup>a,b</sup> Yulong Shen,<sup>c</sup> Jason Slinker<sup>c\*</sup> and Eli Zysman-Colman<sup>d\*</sup>*

<sup>a</sup> *Département de Chimie, Université de Sherbrooke, 2500 Boul. de l'Université, Sherbrooke, QC, Canada, J1K 2R1*

<sup>b</sup> *Present address: Institut de Science et Ingénierie Supramoléculaires (ISIS - UMR 7006) Université de Strasbourg, CNRS, 8 Rue Gaspard Monge, 67000 Strasbourg (France).*

<sup>c</sup> *Department of Physics, The University of Texas at Dallas, 800 W. Campbell Rd., Richardson, TX, 75080, USA*

<sup>d</sup> *EaStCHEM School of Chemistry, University of St Andrews, St Andrews, Fife, UK, KY16 9ST, Fax: +44-1334 463808; Tel: +44-1334 463826; E-mail: ezc@st-andrews.ac.uk; URL: <http://www.zysman-colman.com>*

## **SUPPORTING INFORMATION**

### **Table of contents:**

|                                                                                                        | <b>Pages</b> |
|--------------------------------------------------------------------------------------------------------|--------------|
| <sup>1</sup> H, <sup>13</sup> C NMR and <sup>19</sup> F spectrum of individual compounds and complexes | S2-S15       |

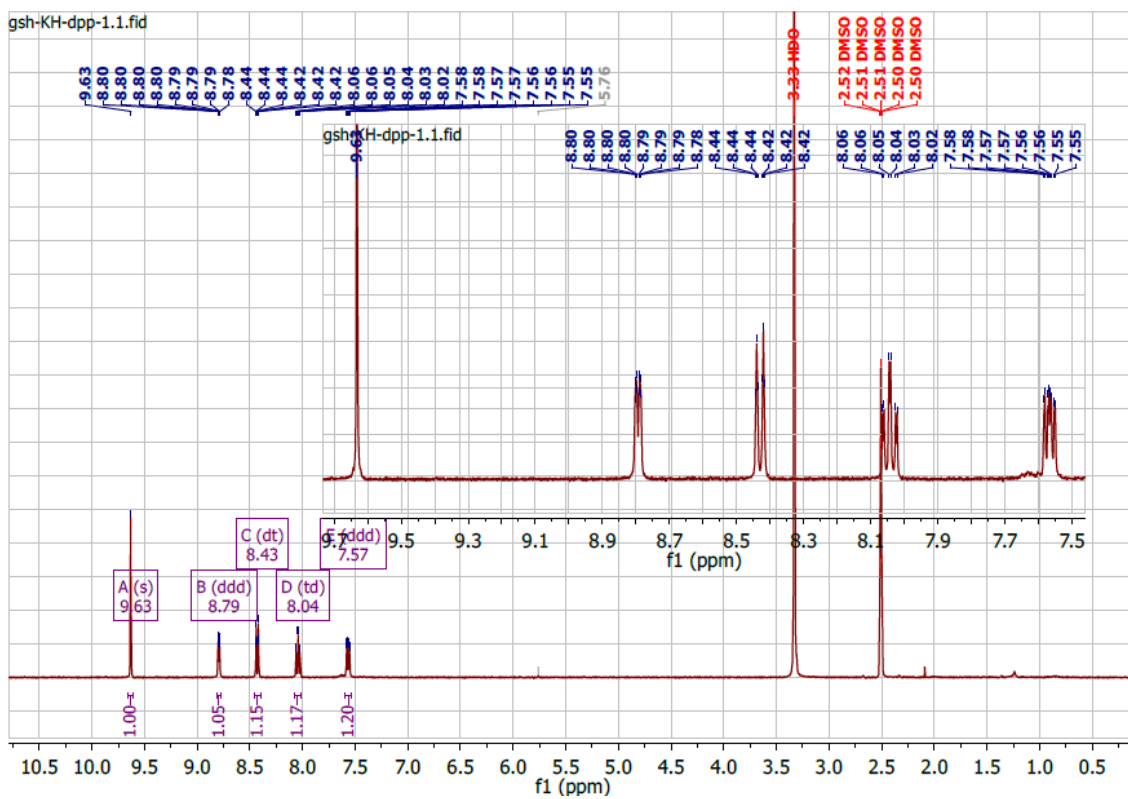

Figure S1. <sup>1</sup>H NMR spectrum of 2,5-di(pyridin-2-yl)pyrazine (2,5-dpp) in DMSO-*d*<sub>6</sub>

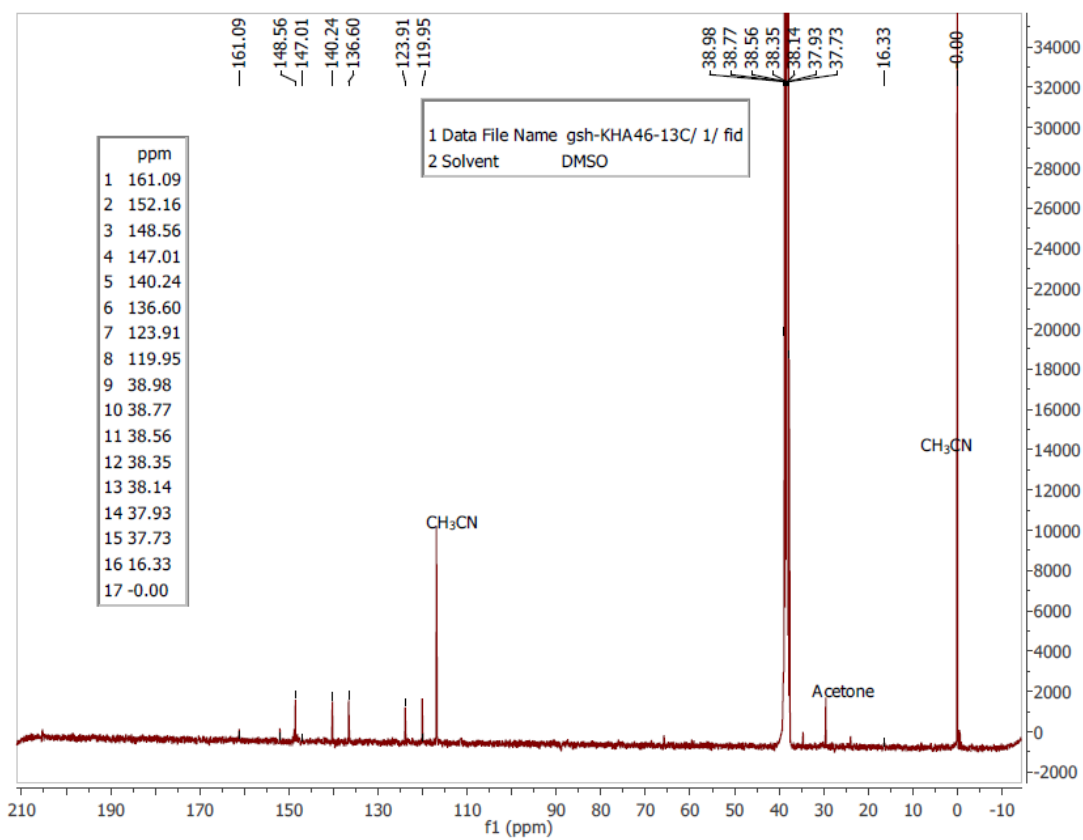

Figure S2. <sup>13</sup>C NMR spectrum of 2,5-di(pyridin-2-yl)pyrazine (2,5-dpp) in DMSO-*d*<sub>6</sub>



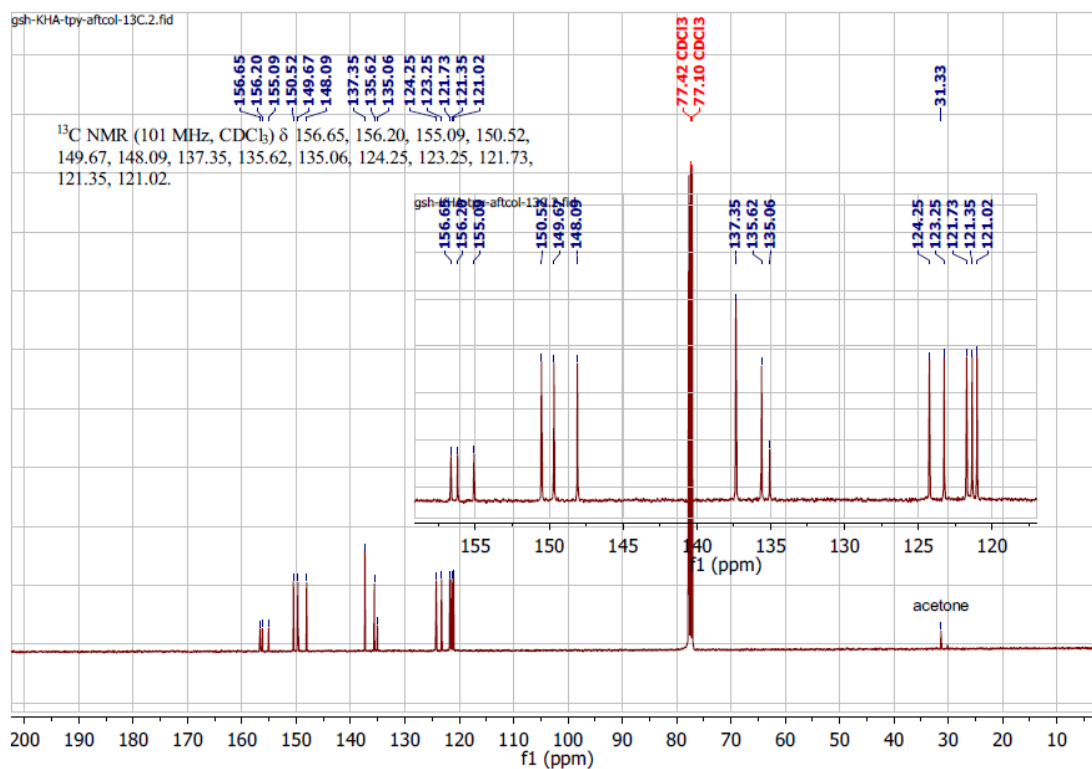

Figure S4.  $^{13}\text{C}$  NMR spectrum of 2,5-di(pyridin-2-yl)pyridine (2,5-tpy) in Chloroform-*d*



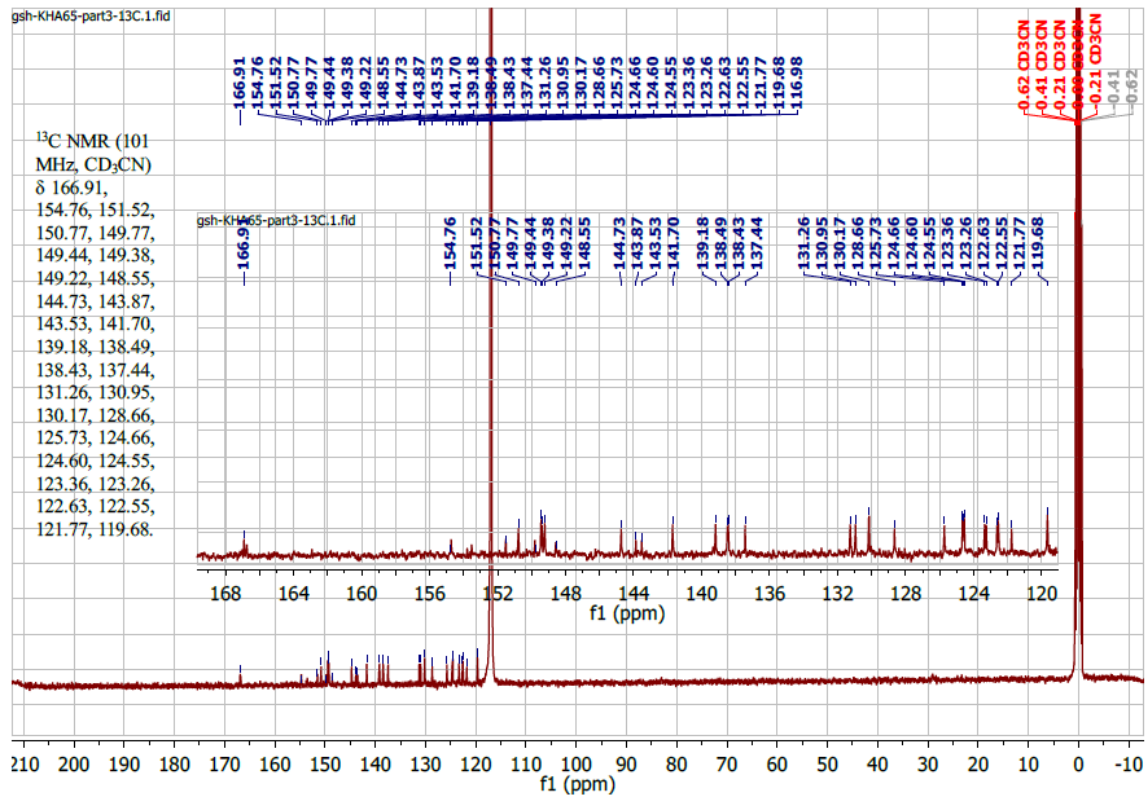

Figure S6.  $^{13}\text{C}$  NMR spectrum of of  $[(\text{ppy})_2\text{Ir}(2,5\text{-dpp})](\text{PF}_6)$  **1a** in Acetonitrile- $d_3$

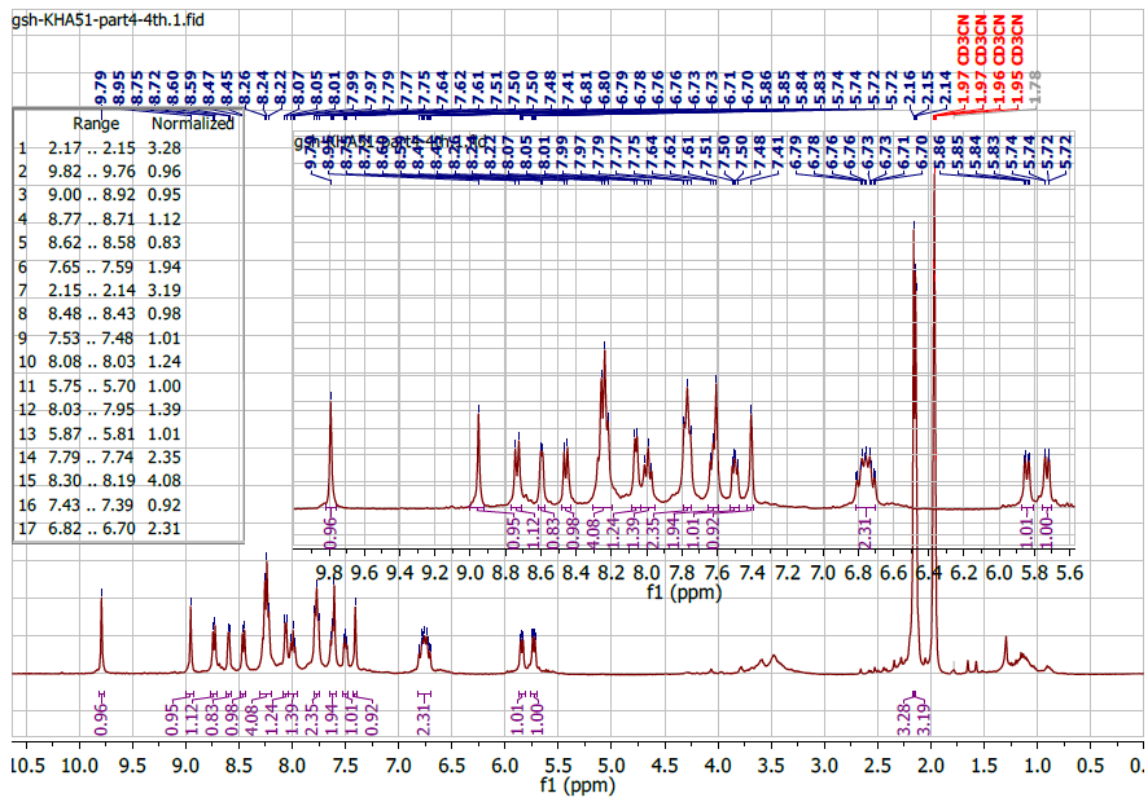

Figure S7.  $^1\text{H}$  NMR spectrum of  $[(2,4\text{-dF-5-Meppy})_2\text{Ir}(2,5\text{-dpp})](\text{PF}_6)$  **1b** in Acetonitrile- $d_3$



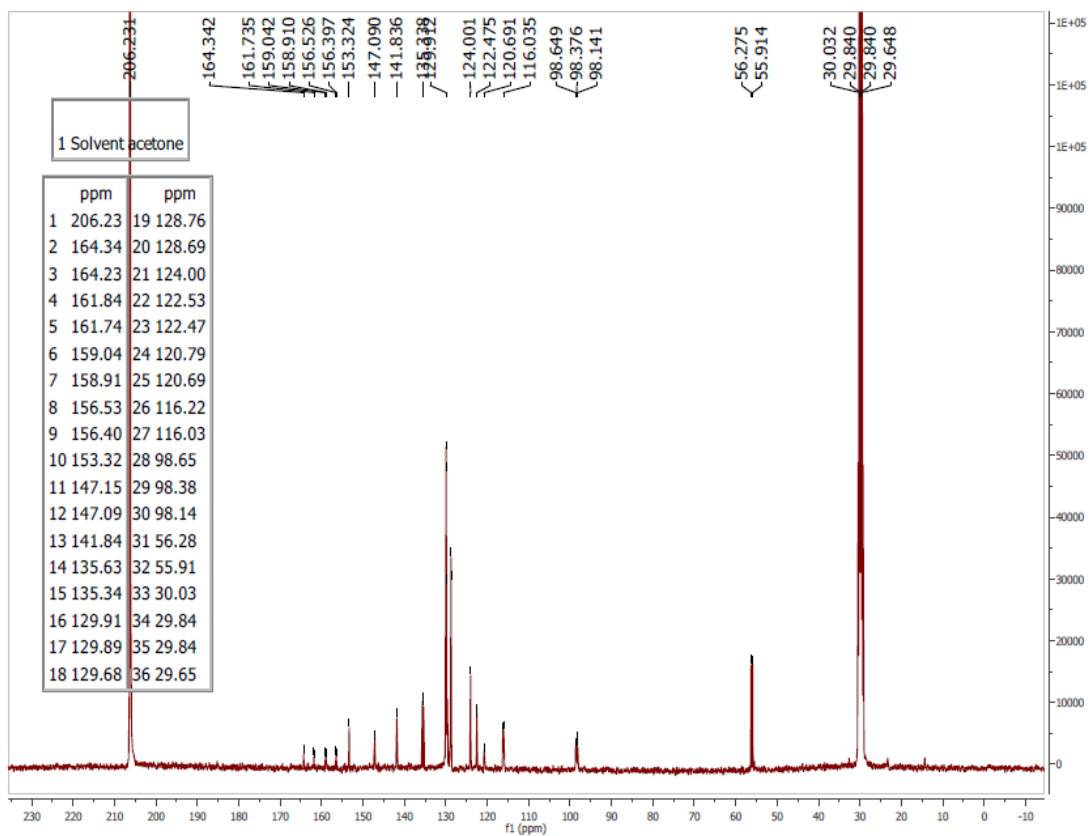

Figure S8.  $^{13}\text{C}$  NMR spectrum of  $[(2,4\text{-dF-}5\text{-Meppy})_2\text{Ir}(2,5\text{-dpp})](\text{PF}_6)$  **1b** in Acetonitrile- $d_3$

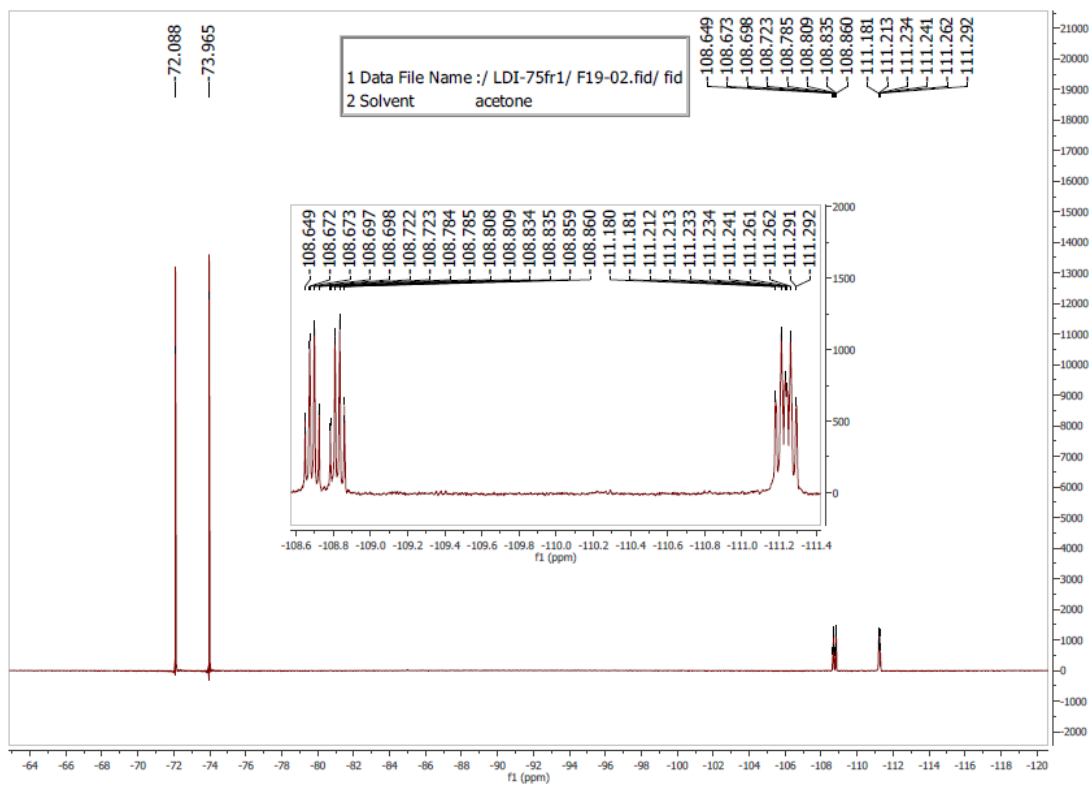

Figure S9.  $^{19}\text{F}$  NMR spectrum of  $[(2,4\text{-dF-5-Meppy})_2\text{Ir}(2,5\text{-dpp})](\text{PF}_6)$  **1b** in Acetonitrile- $d_3$

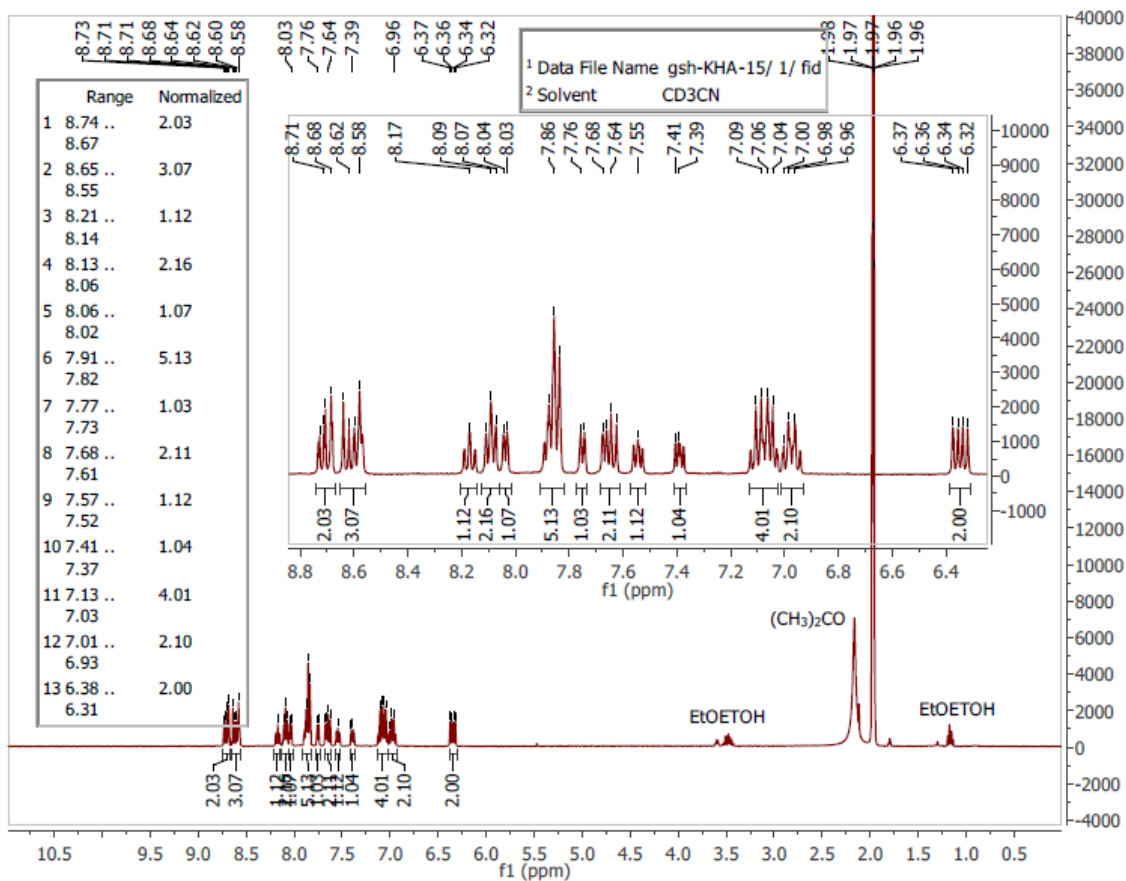

Figure S10. <sup>1</sup>H NMR spectrum of [(ppy)<sub>2</sub>Ir(2,5-tpy)](PF<sub>6</sub>) 2a in Acetonitrile-*d*<sub>3</sub>

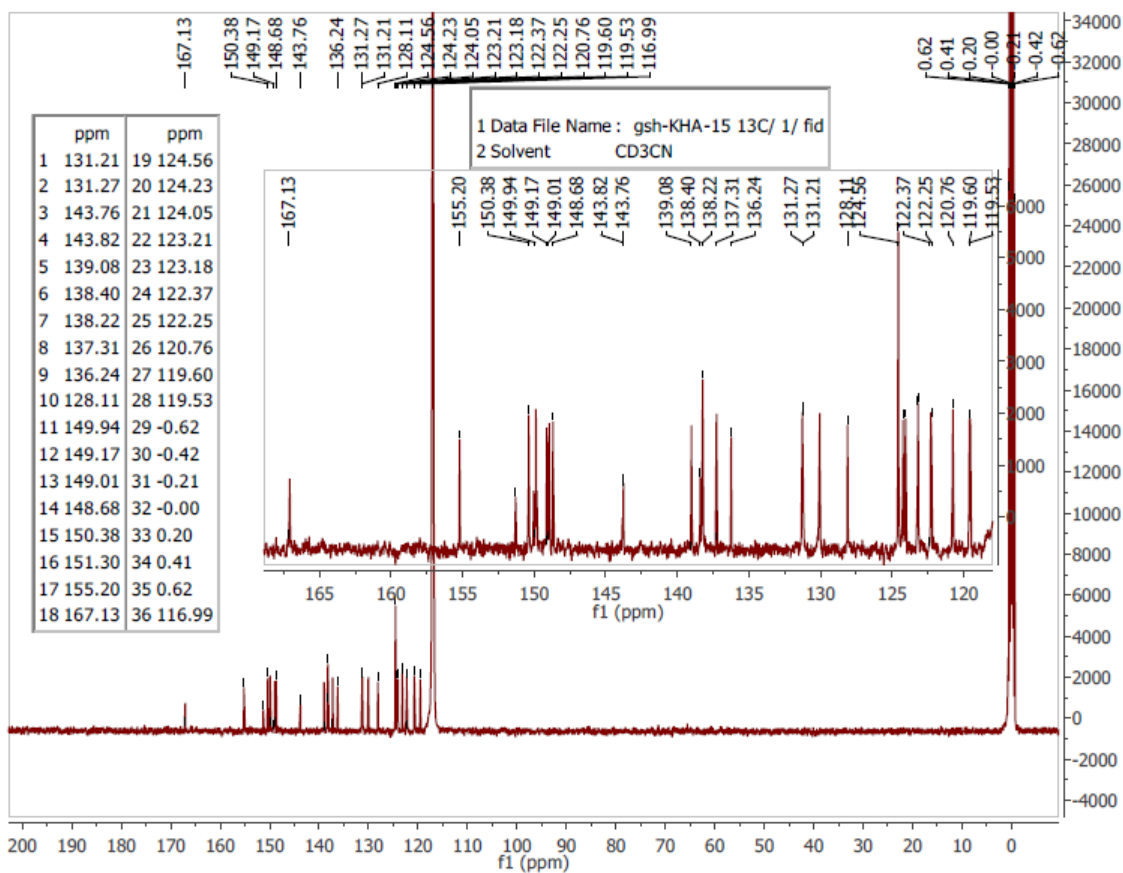

Figure S11.  $^{13}\text{C}$  NMR spectrum of  $[(\text{ppy})_2\text{Ir}(2,5\text{-tpy})](\text{PF}_6)$  **2a** in Acetonitrile- $d_3$

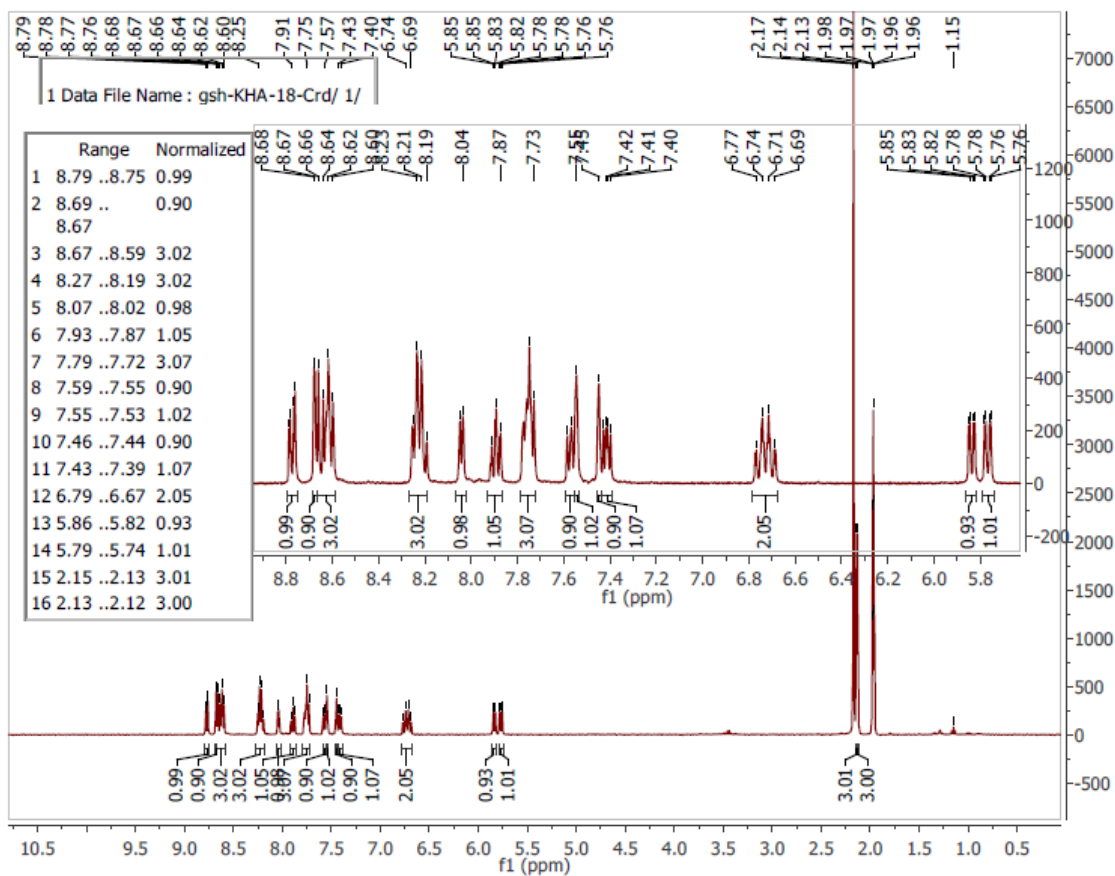

Figure S12.  $^1\text{H}$  NMR spectrum of  $[(2,4\text{-dF-5-Meppy})_2\text{Ir}(2,5\text{-tpy})](\text{PF}_6)$  **2b** in Acetonitrile- $d_3$

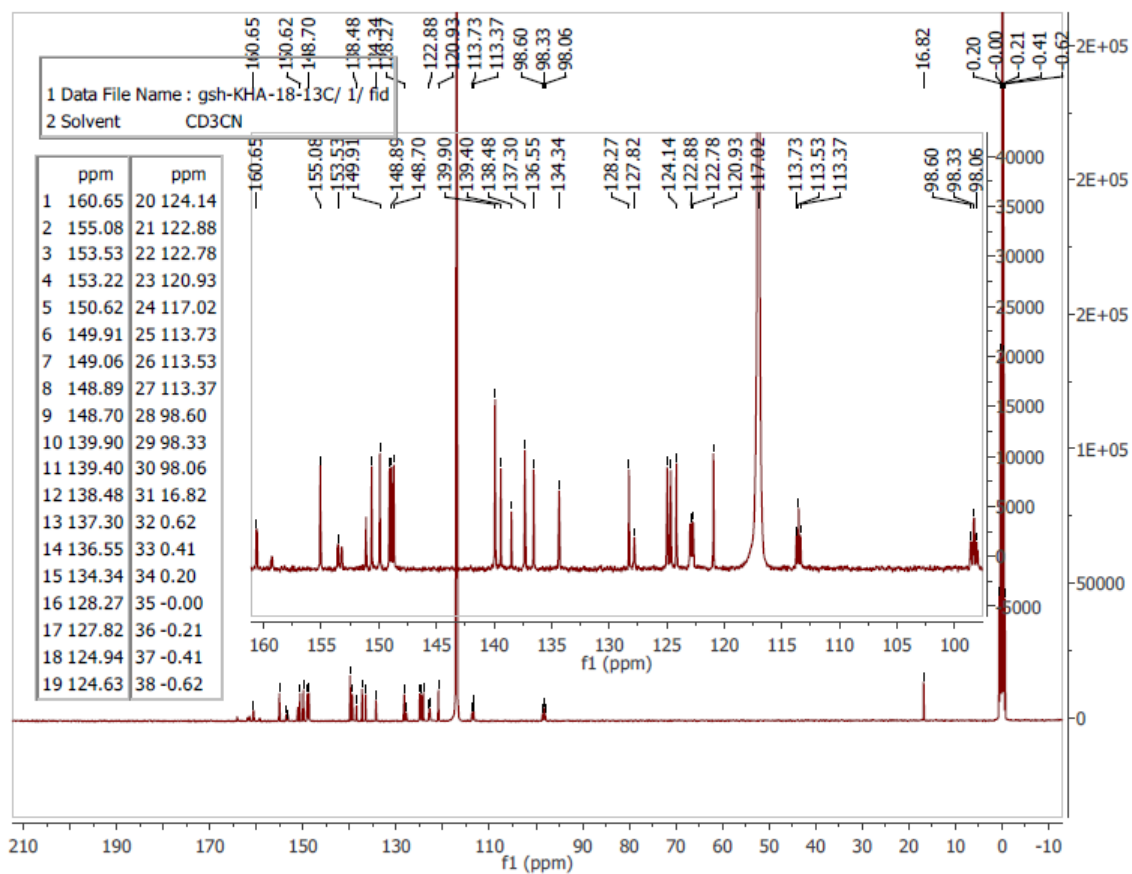

Figure S13.  $^{13}\text{C}$  NMR spectrum of  $[(2,4\text{-dF-}5\text{-Meppy})_2\text{Ir}(2,5\text{-tpy})](\text{PF}_6)$  **2b** in Acetonitrile- $d_3$

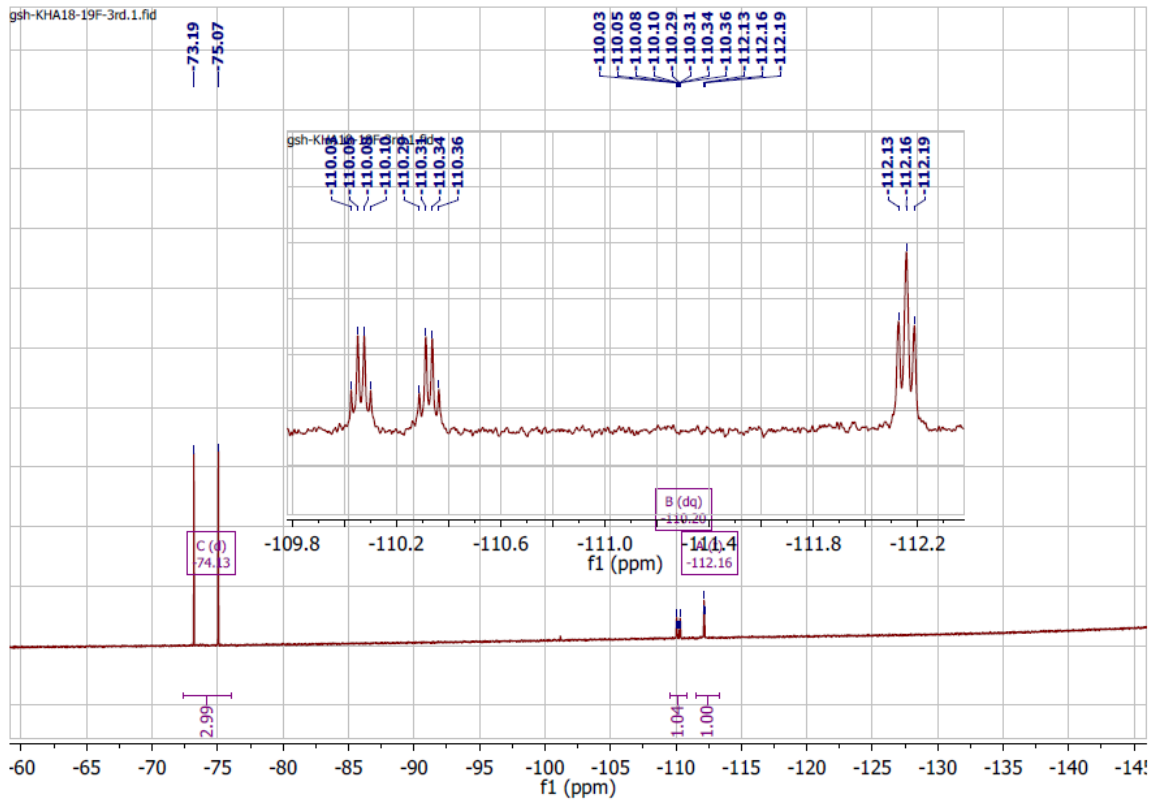

Figure S14.  $^{19}\text{F}$  NMR spectrum of  $[(2,4\text{-dF-}5\text{-Meppy})_2\text{Ir}(2,5\text{-tpy})](\text{PF}_6)$  **2b** in Acetonitrile- $d_3$
